# Supplementary material
Source: publisher figshare collection journal article supplement (https://future-science-group.figshare.com/ndownloader/files/34788127)
Supplement: Supplementary file 1 [file 34788127]

**Supplementary Figure 1: Funnel plots before (A) and after (B) applying the trim-and-fill method. The open dots indicate the observed studies, and the closed dots indicate the missing studies imputed by the trim-and-fill method.**

***Supplementary Figure* 2. The pooled prevalence of HHV-6 among primary brain cancer patients based on study type. Each dot in figures indicates the prevalence along with the 95% CI associated with each study**

***Supplementary Figure* 3. The pooled prevalence of HHV-6 among primary brain cancer patients based on Detection method. Each dot in figures indicates the prevalence along with the 95% CI associated with each study**

**PCR: polymerase chain reaction, ELISA: enzyme-linked immunosorbent assay, NGS: next generation sequencing, ISH: in situ hybridization, IHC: immunohistochemistry**

***Supplementary Figure* 4. The pooled prevalence of HHV-6 among primary brain cancer patients based on sample type. Each dot in figures indicates the prevalence along with the 95% CI associated with each study**

**FFPE: Formalin-Fixed Paraffin-Embedded**

***Supplementary Figure* 5. The pooled prevalence of HHV-6 among primary brain cancer patients based on geographical area. Each dot in figures indicates the prevalence along with the 95% CI associated with each study**

***Supplementary Figure* 6. Overall Association between HHV-6 and primary brain cancer. Each dot in figures indicates the prevalence along with the 95% CI associated with each study**

***Supplementary Figure* 7. Association between HHV-6 and primary brain cancer based on detection method. Each dot in figures indicates the prevalence along with the 95% CI associated with each study**

**PCR: polymerase chain reaction, ISH: in situ hybridization, IHC: immunohistochemistry**

***Supplementary Figure* 8. Association between HHV-6 and primary brain cancer based on sample types. Each dot in figures indicates the prevalence along with the 95% CI associated with each study**

**FFPE: Formalin-Fixed Paraffin-Embedded**

***Supplementary Figure* 9. Association between HHV-6 and primary brain cancer based on geographical areas. Each dot in figures indicates the prevalence along with the 95% CI associated with each study**
